# Supplementary material for: Simplified Synthesis of Renieramycin T Derivatives to Target Cancer Stem Cells via β-Catenin Proteasomal Degradation in Human Lung Cancer
Source: MDPI journal article supplement (doi:10.3390/md21120627), 2023-11-30
Supplement: s1 [file s1]

## Supporting Information

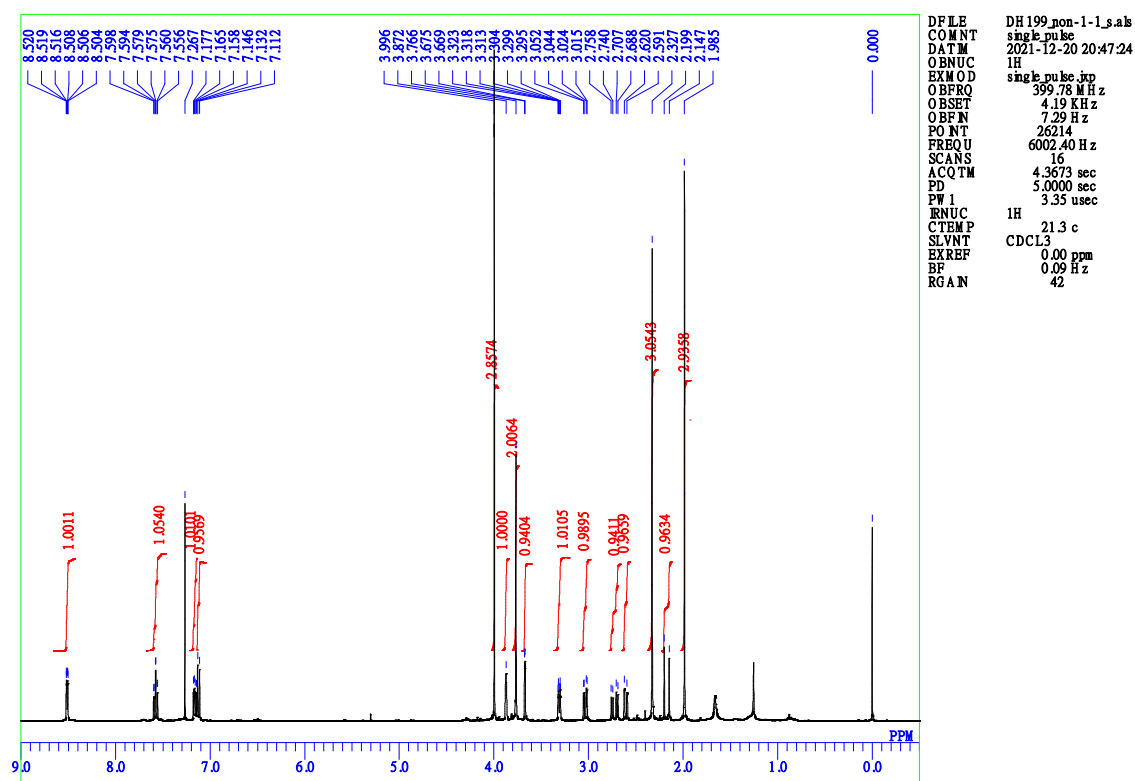

A

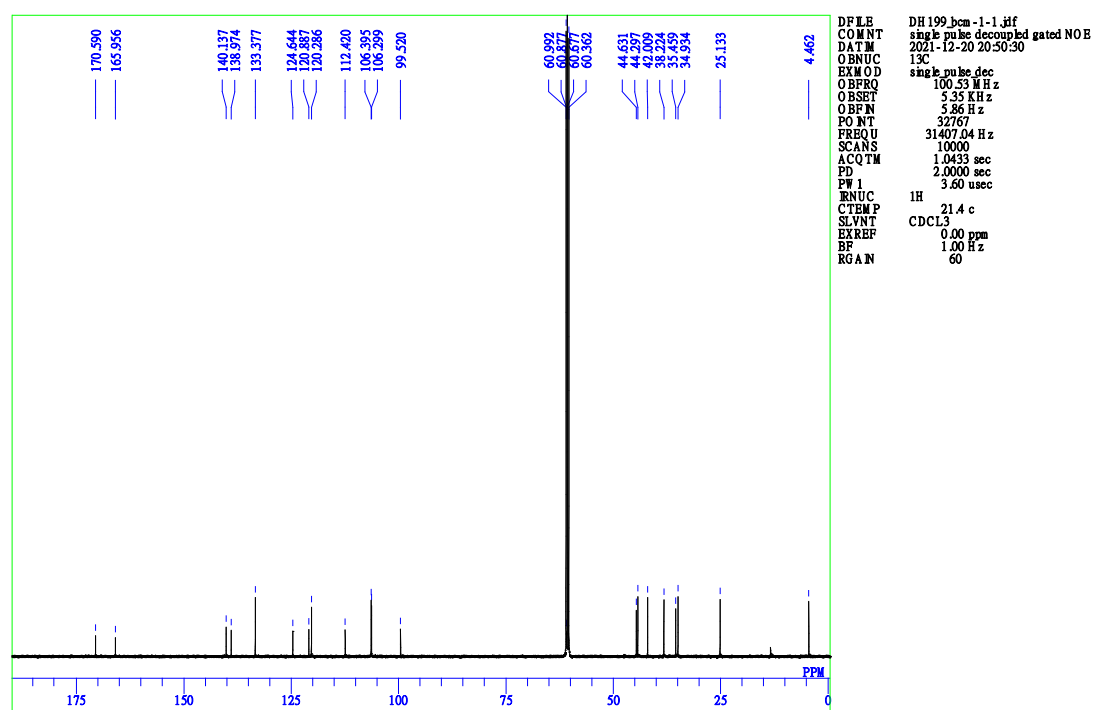

B

**Figure S1.** (A).  $^1\text{H}$ -NMR of **4a: DH\_18** in  $\text{CDCl}_3$  (400 MHz). (B).  $^{13}\text{C}$ -NMR of **4a: DH\_18** in  $\text{CDCl}_3$  (100 MHz).

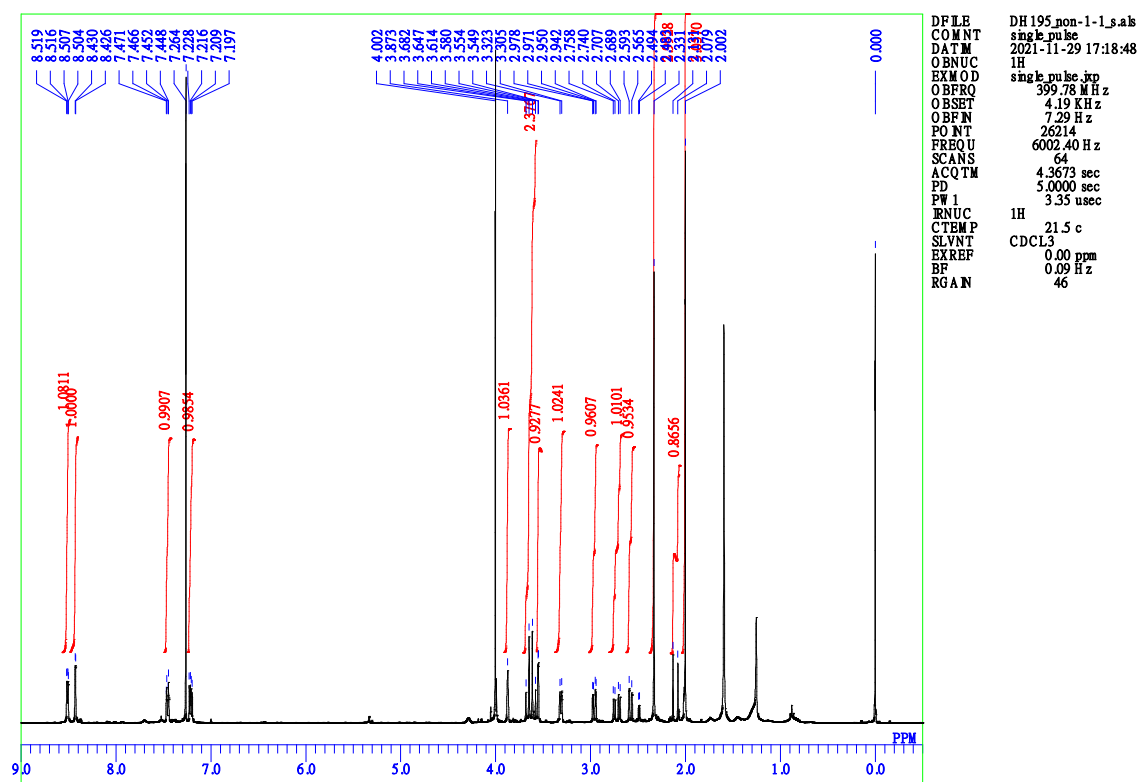

A

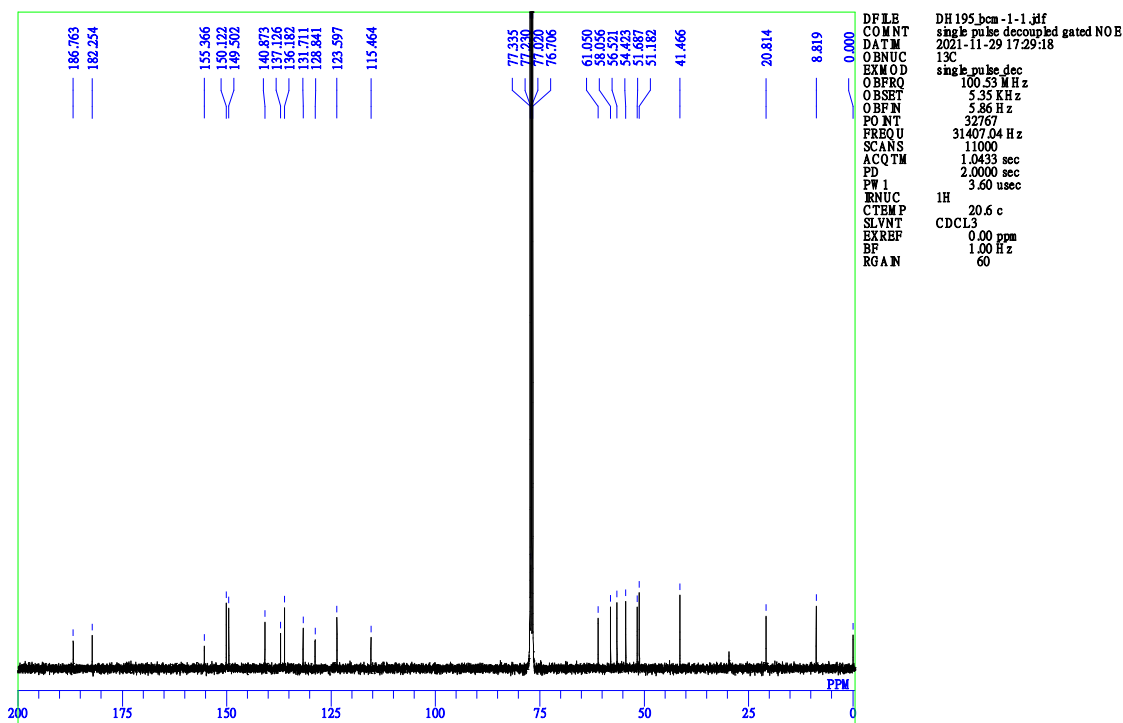

B

**Figure S2. (A).**  $^1\text{H}$ -NMR of **4b: DH\_21** in  $\text{CDCl}_3$  (400 MHz). **(B).**  $^{13}\text{C}$ -NMR of **4b: DH\_21** in  $\text{CDCl}_3$  (100 MHz).

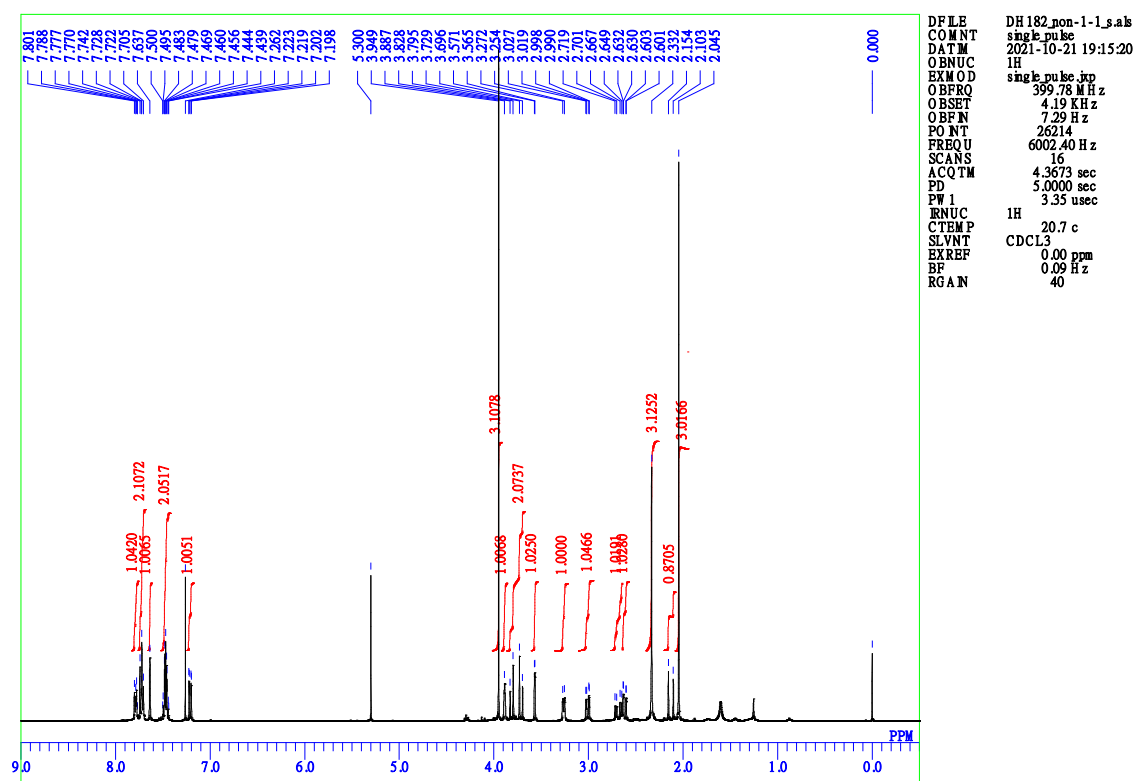

DH182\_non-1-1.sals  
 COMNT single\_pulse  
 DATM 2021-10-21 19:15:20  
 OBNUC 1H  
 EXMOD single\_pulse.jxp  
 OBFRO 399.78 MHz  
 OBSET 4.19 KHz  
 OBFN 7.29 Hz  
 PO NT 26214  
 FREQU 6002.40 Hz  
 SCANS 16  
 ACQTM 4.3673 sec  
 PD 5.0000 sec  
 PW 1 3.35 usec  
 RNUC 1H  
 CTEMP 20.7 c  
 SLVNT CDCL3  
 EXREF 0.00 ppm  
 BF 0.09 Hz  
 RGAN 40

A

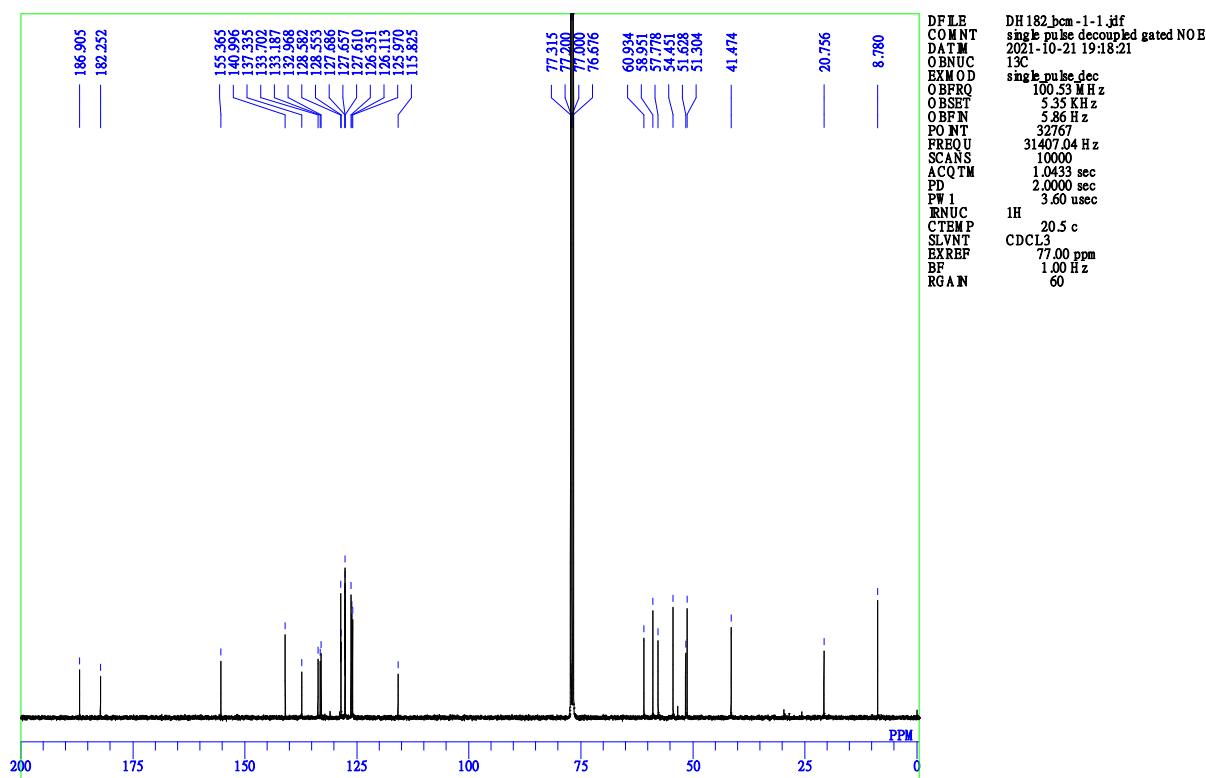

DH182\_bcm-1-1.jif  
 COMNT single\_pulse decoupled gated NOE  
 DATM 2021-10-21 19:18:21  
 OBNUC 13C  
 EXMOD single\_pulse.dec  
 OBFRO 100.53 MHz  
 OBSET 5.35 KHz  
 OBFN 5.86 Hz  
 PO NT 32767  
 FREQU 31407.04 Hz  
 SCANS 10000  
 ACQTM 1.0433 sec  
 PD 2.0000 sec  
 PW 1 3.60 usec  
 RNUC 1H  
 CTEMP 20.5 c  
 SLVNT CDCL3  
 EXREF 77.00 ppm  
 BF 1.00 Hz  
 RGAN 60

B

Figure S3. (A).  $^1\text{H}$ -NMR of **4c: DH\_32** in  $\text{CDCl}_3$  (400 MHz). (B).  $^{13}\text{C}$ -NMR of **4c: DH\_32** in  $\text{CDCl}_3$  (100 MHz).

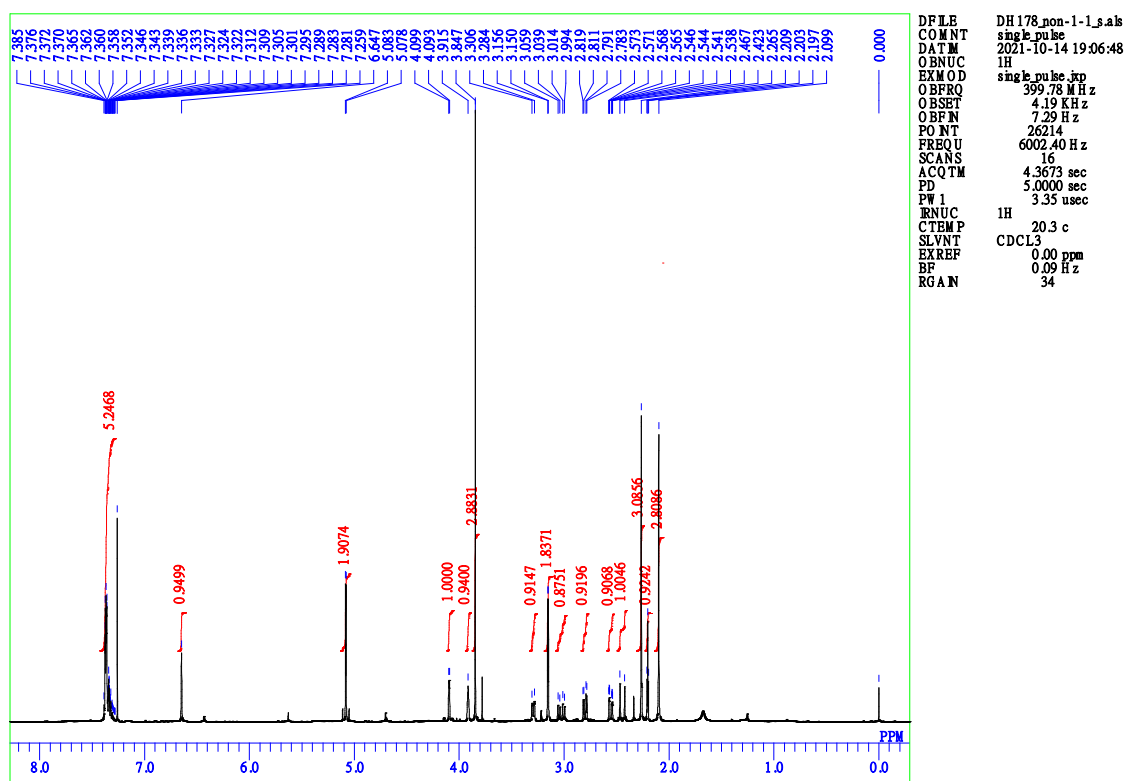

A

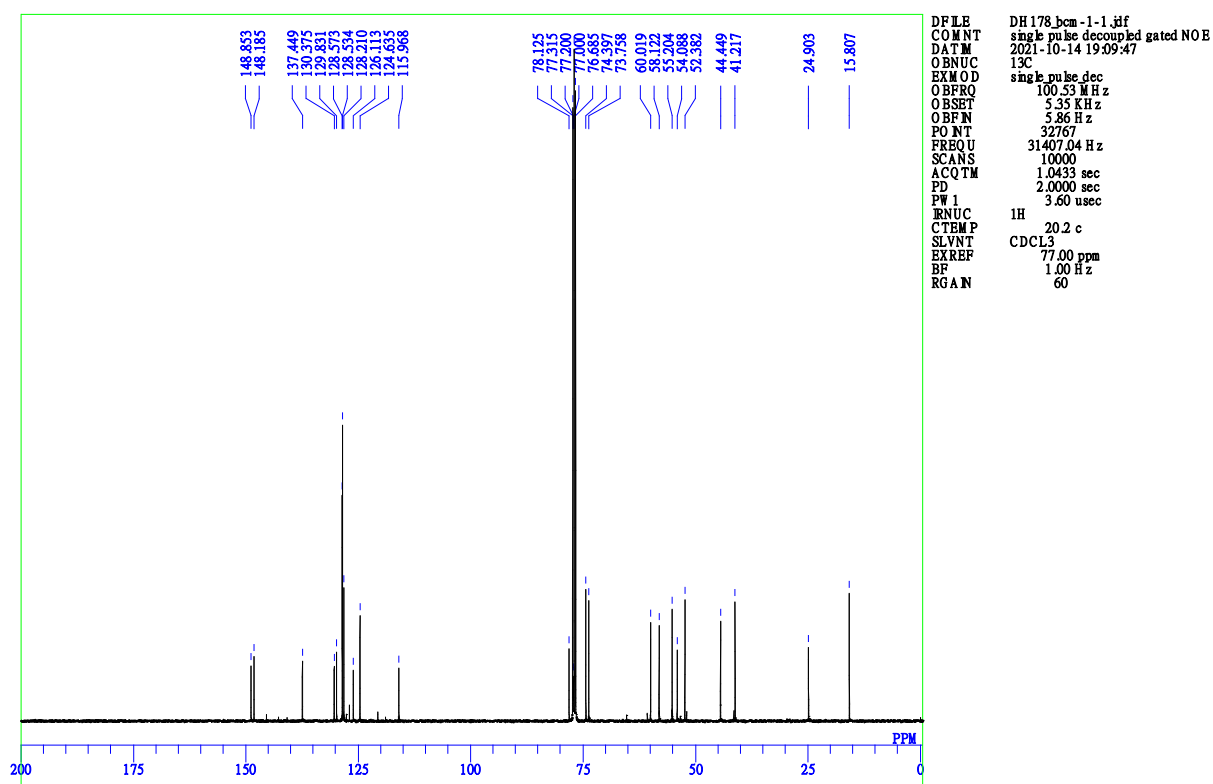

B

Figure S4. (A).  $^1\text{H}$ -NMR of **2d** in  $\text{CDCl}_3$  (400 MHz). (B).  $^{13}\text{C}$ -NMR of **2d** in  $\text{CDCl}_3$  (100 MHz).

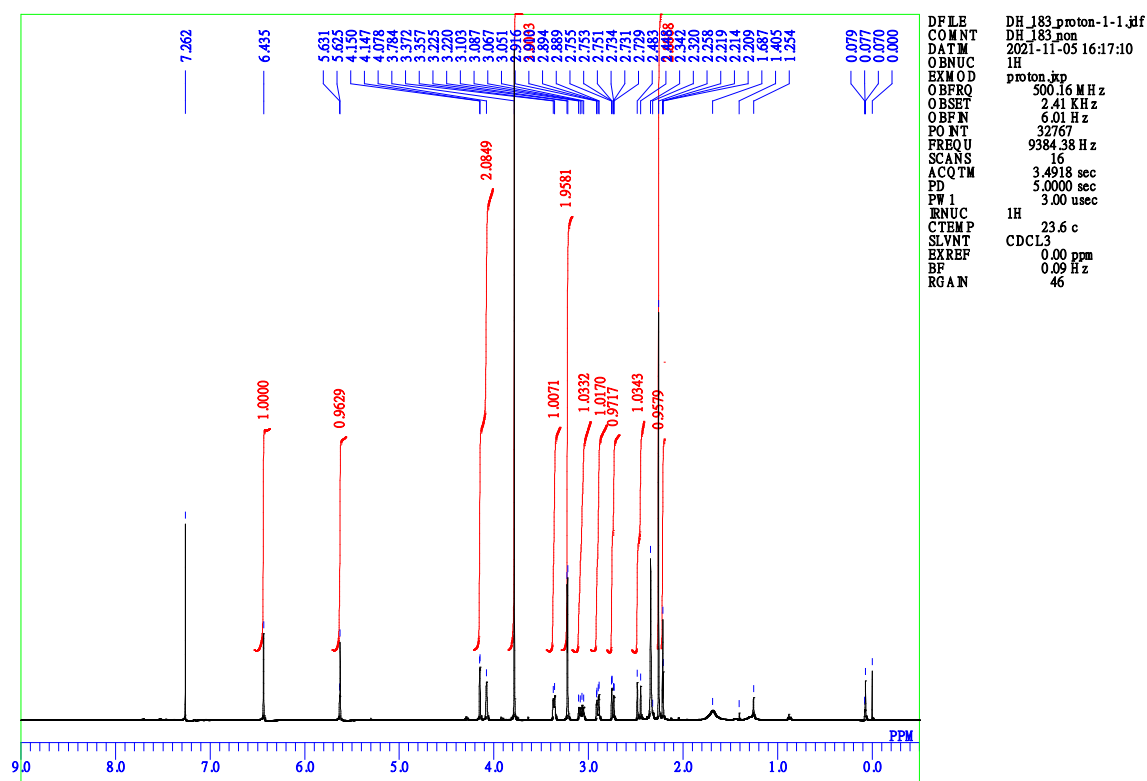

A

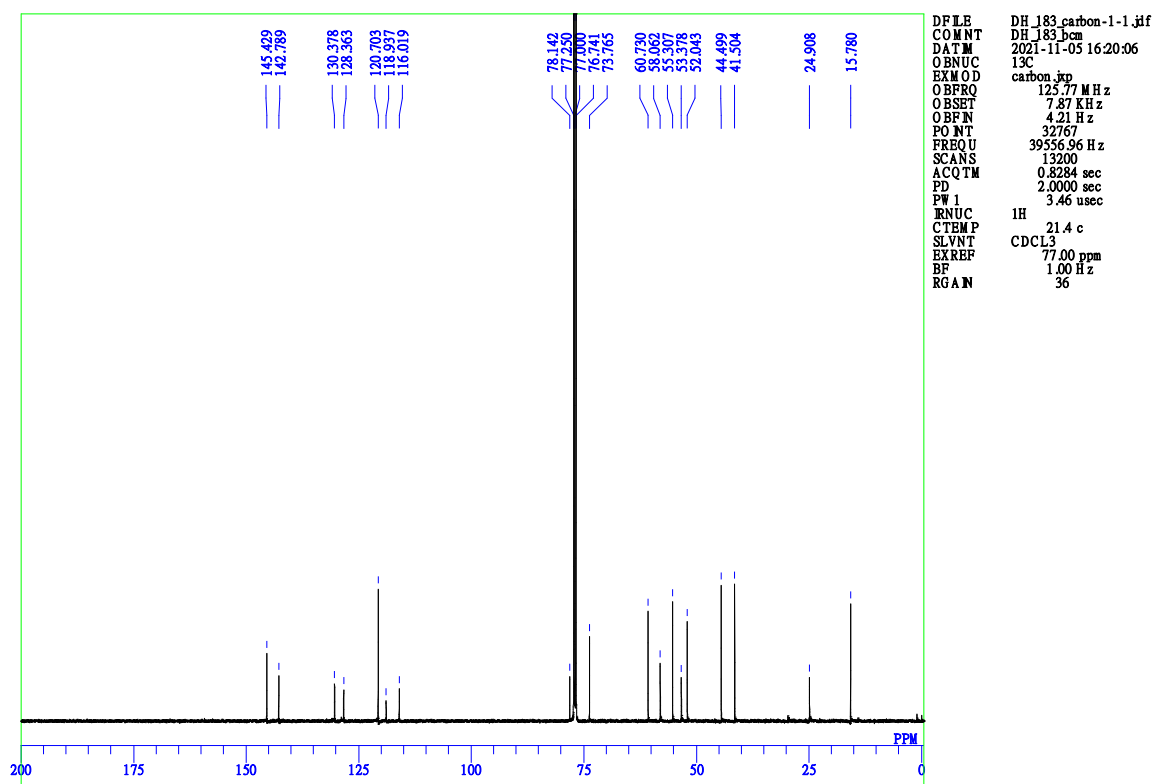

B

**Figure S5.** (A). <sup>1</sup>H-NMR of **3d** in CDCl<sub>3</sub> (500 MHz). (B). <sup>13</sup>C-NMR of **3d** in CDCl<sub>3</sub> (125 MHz).

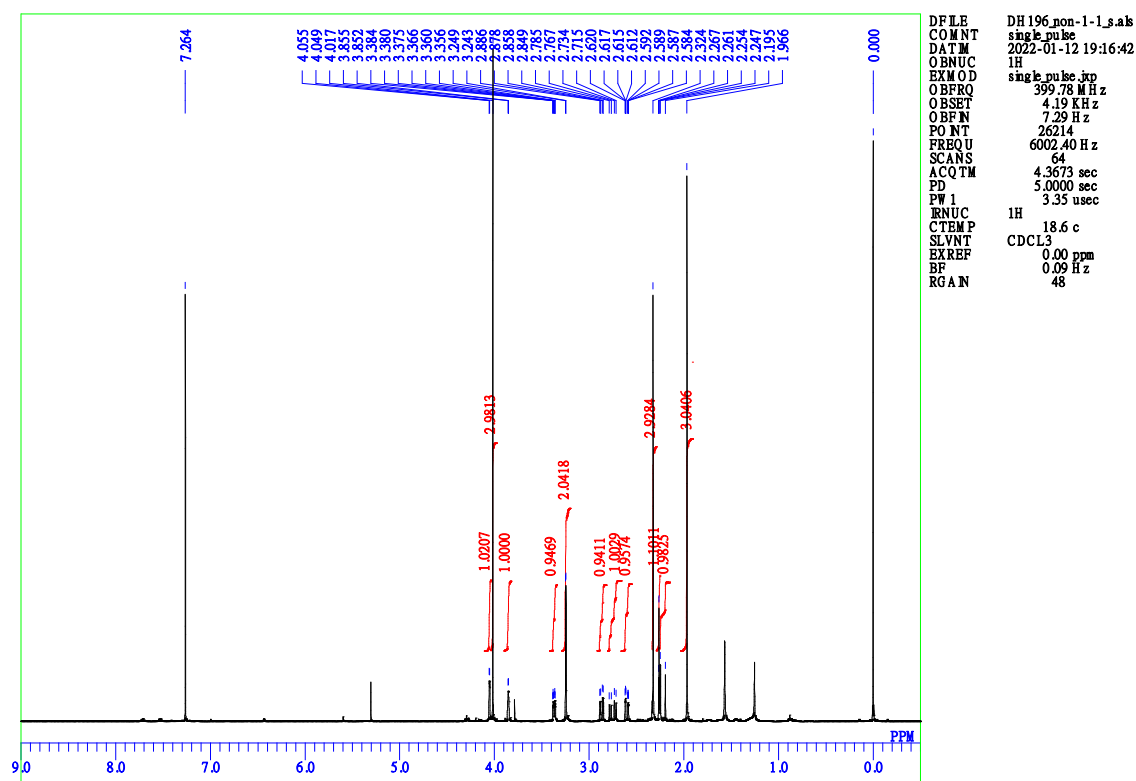

A

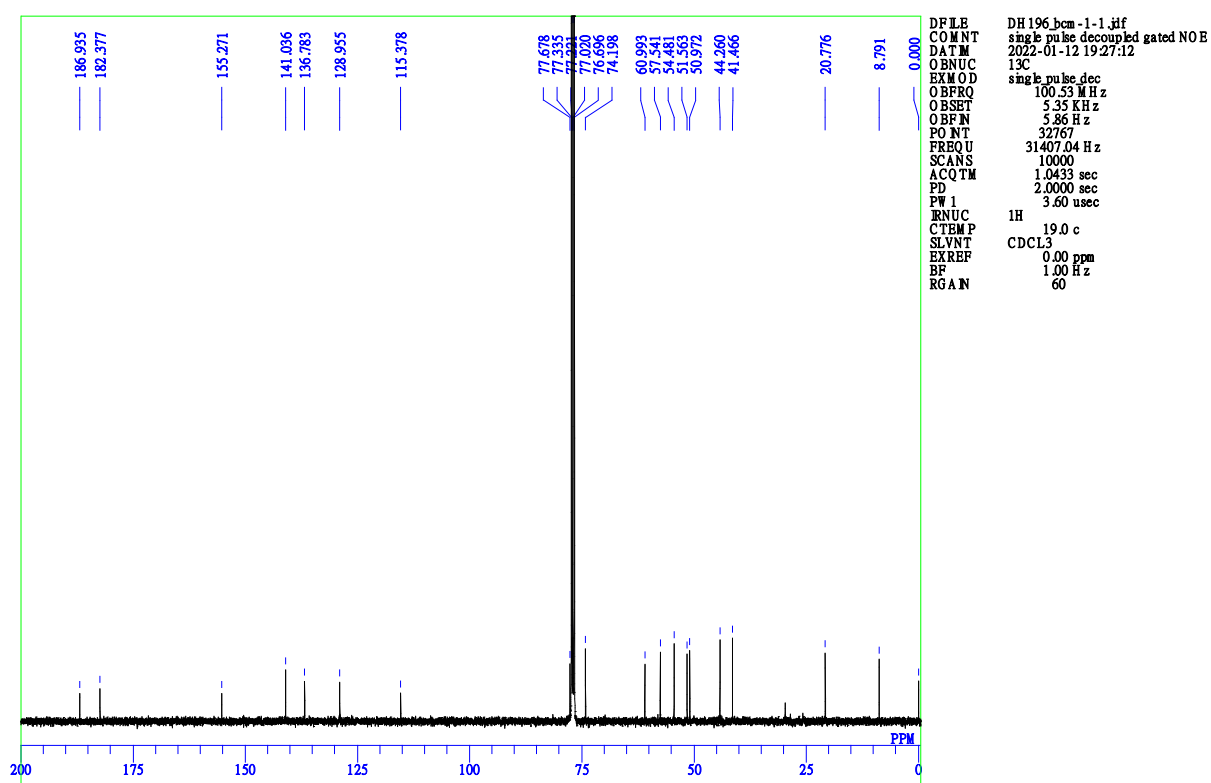

B

**Figure S6. (A).**  $^1\text{H}$ -NMR of **4d: DH\_35** in  $\text{CDCl}_3$  (400 MHz). **(B).**  $^{13}\text{C}$ -NMR of **4d: DH\_35** in  $\text{CDCl}_3$  (100 MHz).

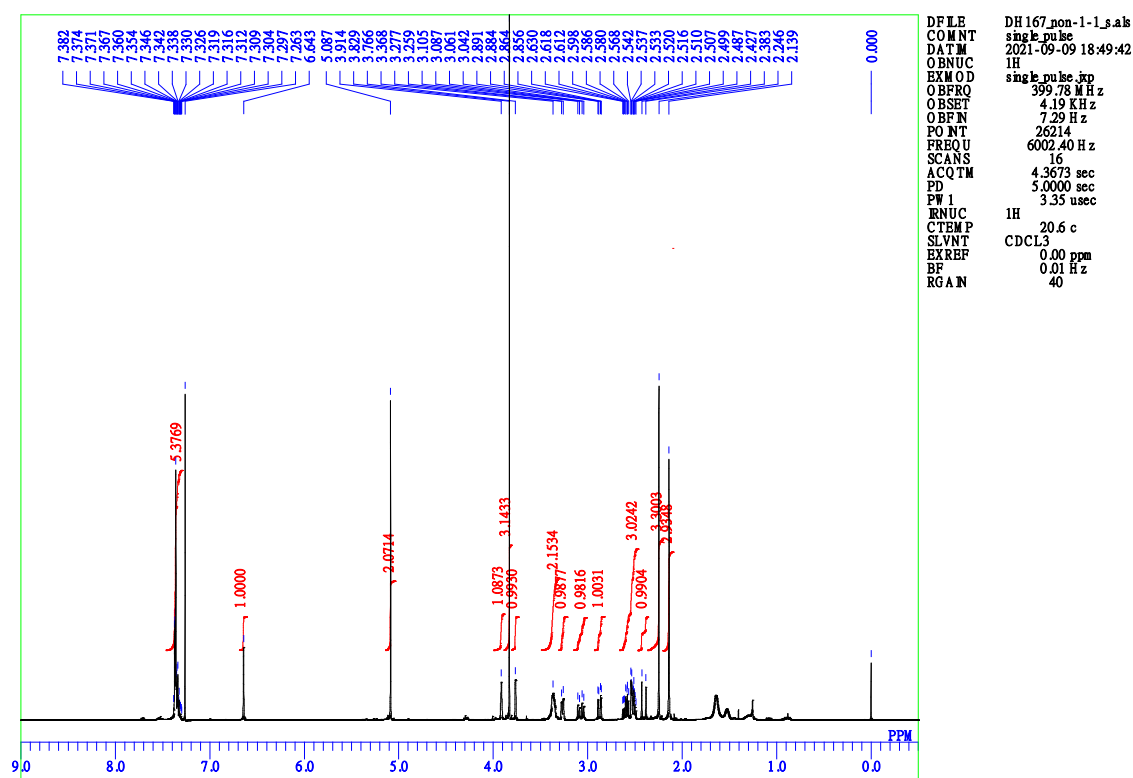

A

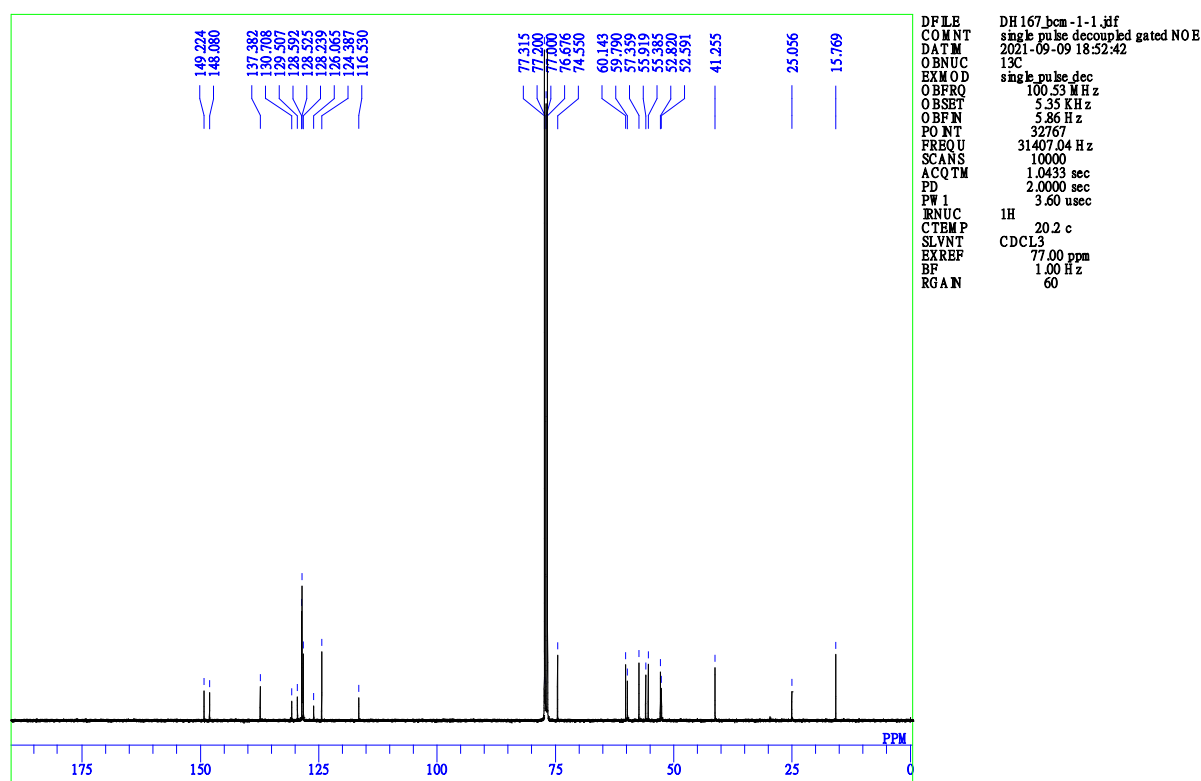

B

**Figure S7. (A).**  $^1\text{H}$ -NMR of **2e** in  $\text{CDCl}_3$  (400 MHz). **(B).**  $^{13}\text{C}$ -NMR of **2e** in  $\text{CDCl}_3$  (100 MHz).



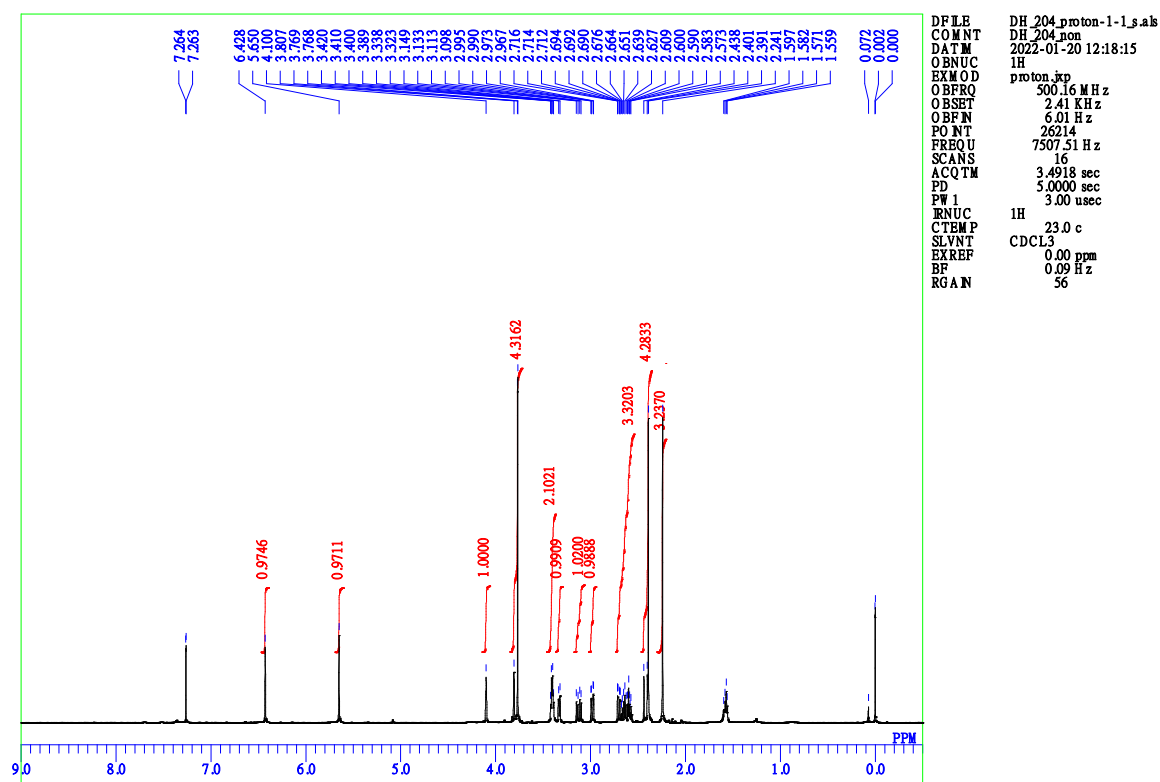

A

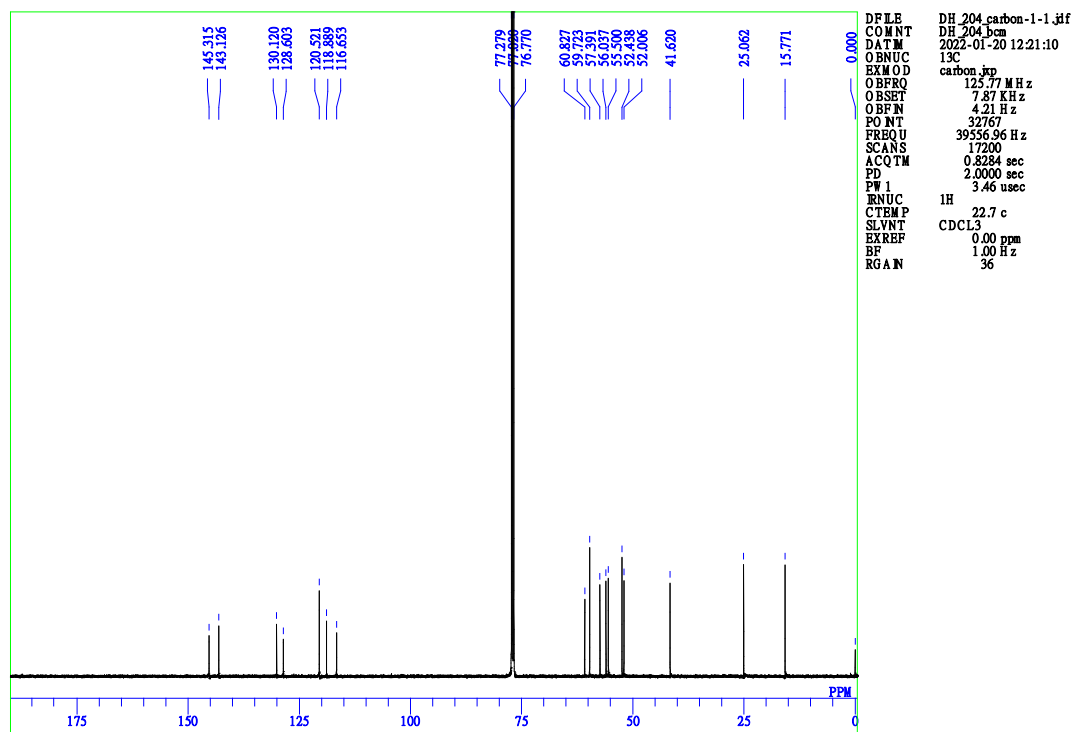

B

**Figure S8.** (A).  $^1\text{H}$ -NMR of **3e** in  $\text{CDCl}_3$  (500 MHz). (B).  $^{13}\text{C}$ -NMR of **3e** in  $\text{CDCl}_3$  (125 MHz).

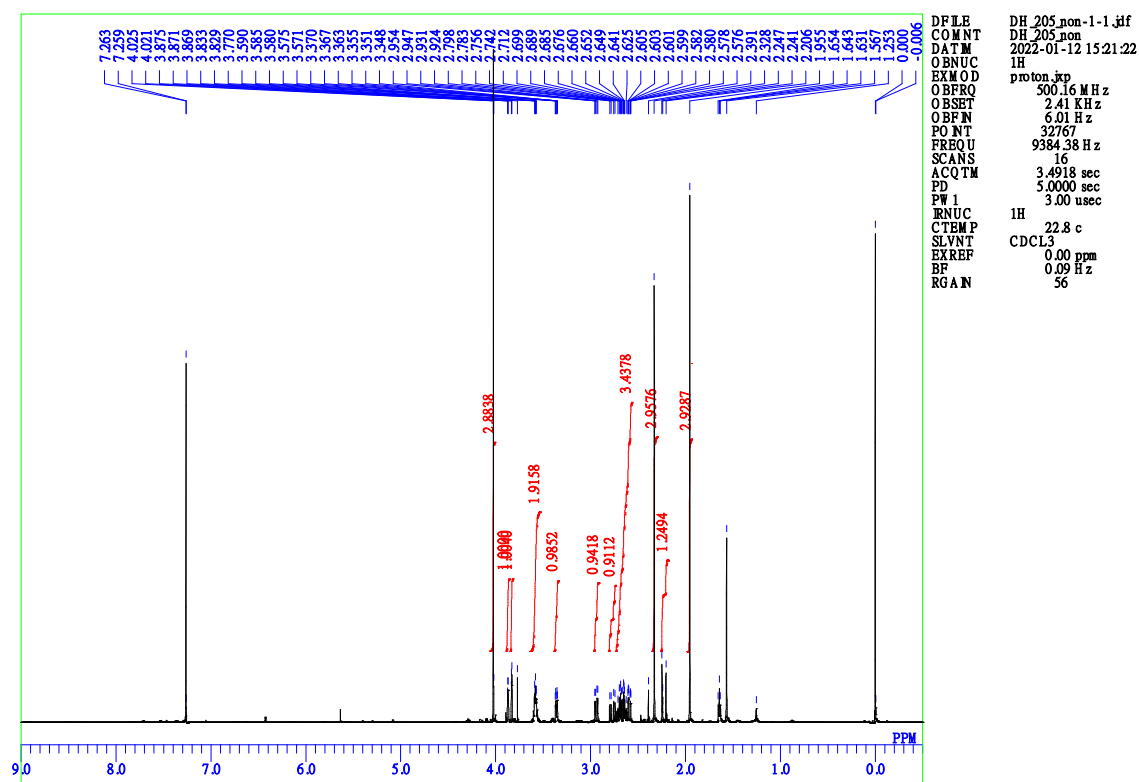

A

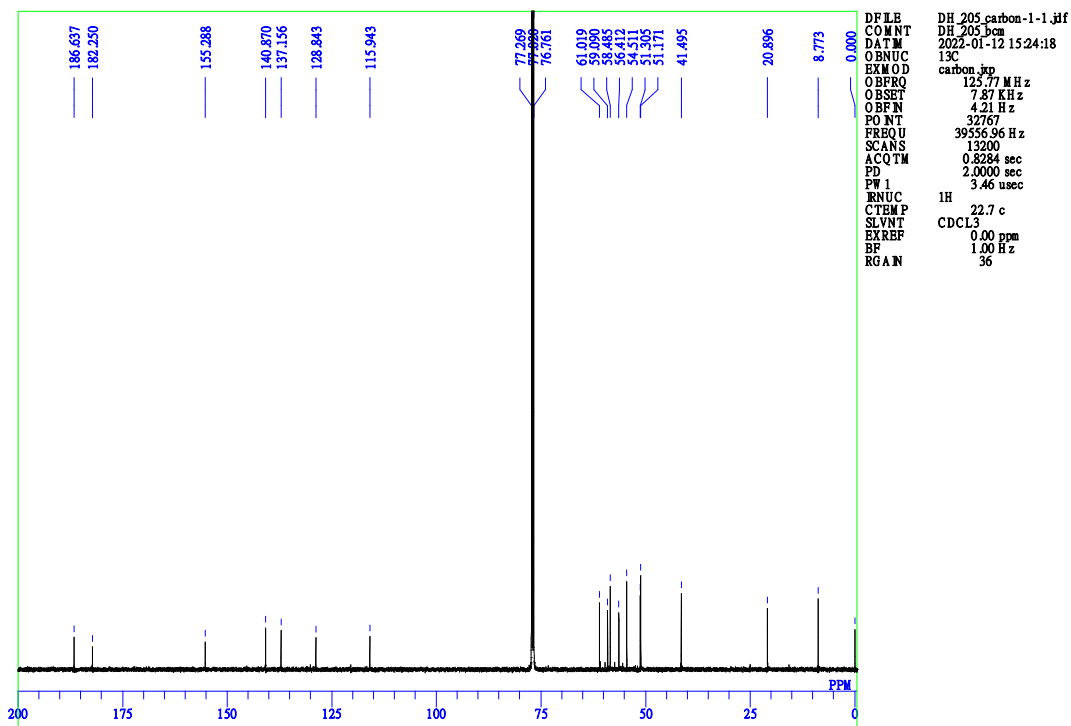

B

**Figure S9.** (A).  $^1\text{H}$ -NMR of **4e: DH\_38** in  $\text{CDCl}_3$  (500 MHz). (B).  $^{13}\text{C}$ -NMR of **4e: DH\_38** in  $\text{CDCl}_3$  (125 MHz).

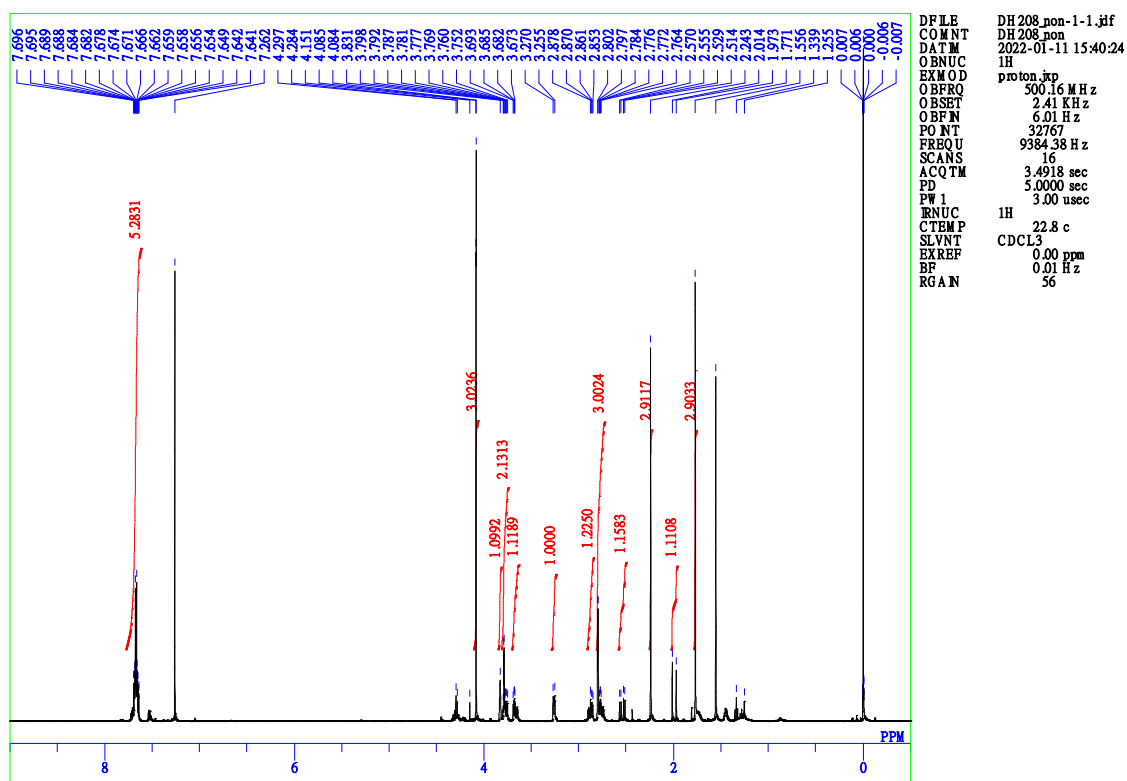

A

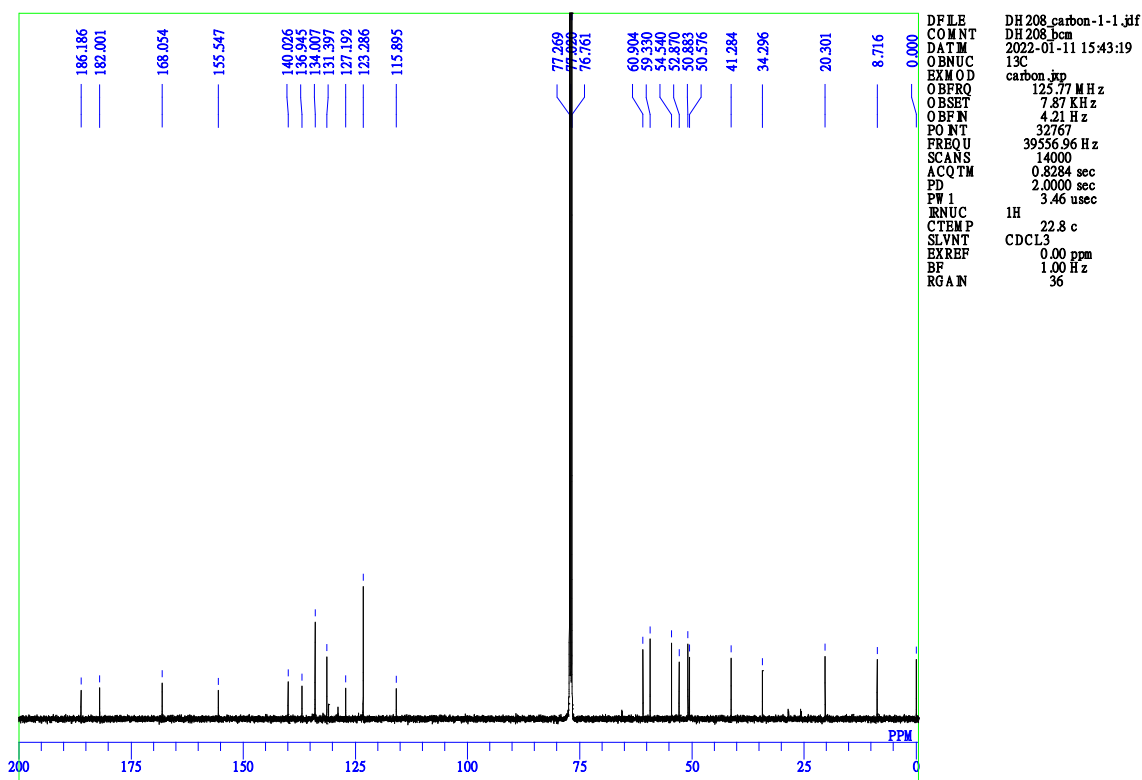

B

**Figure S10.** (A).  $^1\text{H}$ -NMR of **4f: DH\_39** in  $\text{CDCl}_3$  (500 MHz). (B).  $^{13}\text{C}$ -NMR of **4f: DH\_39** in  $\text{CDCl}_3$  (125 MHz).
